# Supplementary material for: Biomimetic synthesis of silica hollow spheres using poly (l-lysine) and mechanism research
Source: Royal Society of Chemistry journal article supplement (doi:10.1039/c2ra00019a), 2012-01-01
Supplement: c2ra00019a.pdf [file c2ra00019a.pdf]

## Supporting Information

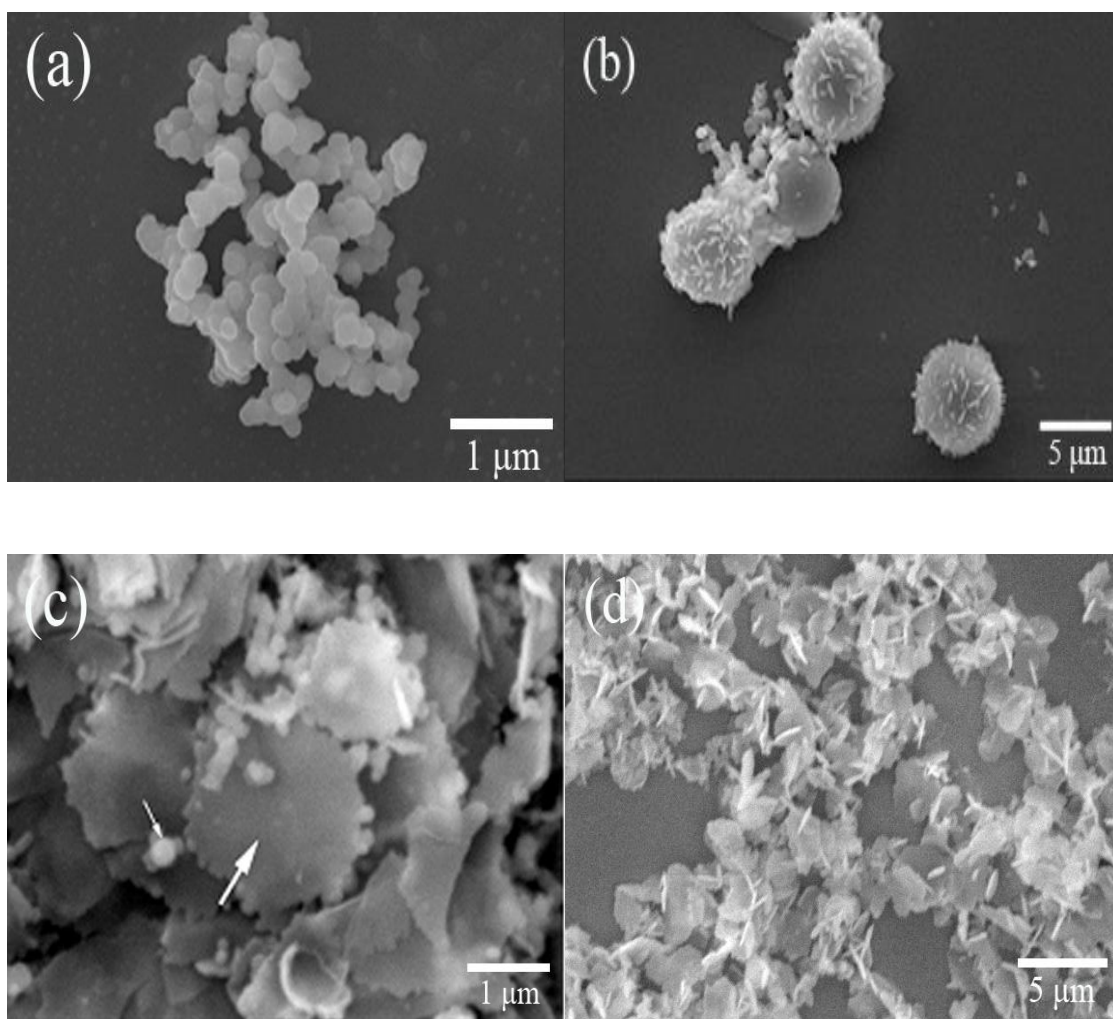

**Fig. S1** The chains of polypeptide tuned the morphologies of silica using: (a) PLL<sub>1</sub> (MW = 1-5 KDa), (b) PLL<sub>2</sub> (MW = 4-15 KDa), (c) PLL<sub>3</sub> (MW = 15-30 KDa), and (d) PLL<sub>4</sub> (MW = 30-70 KDa).

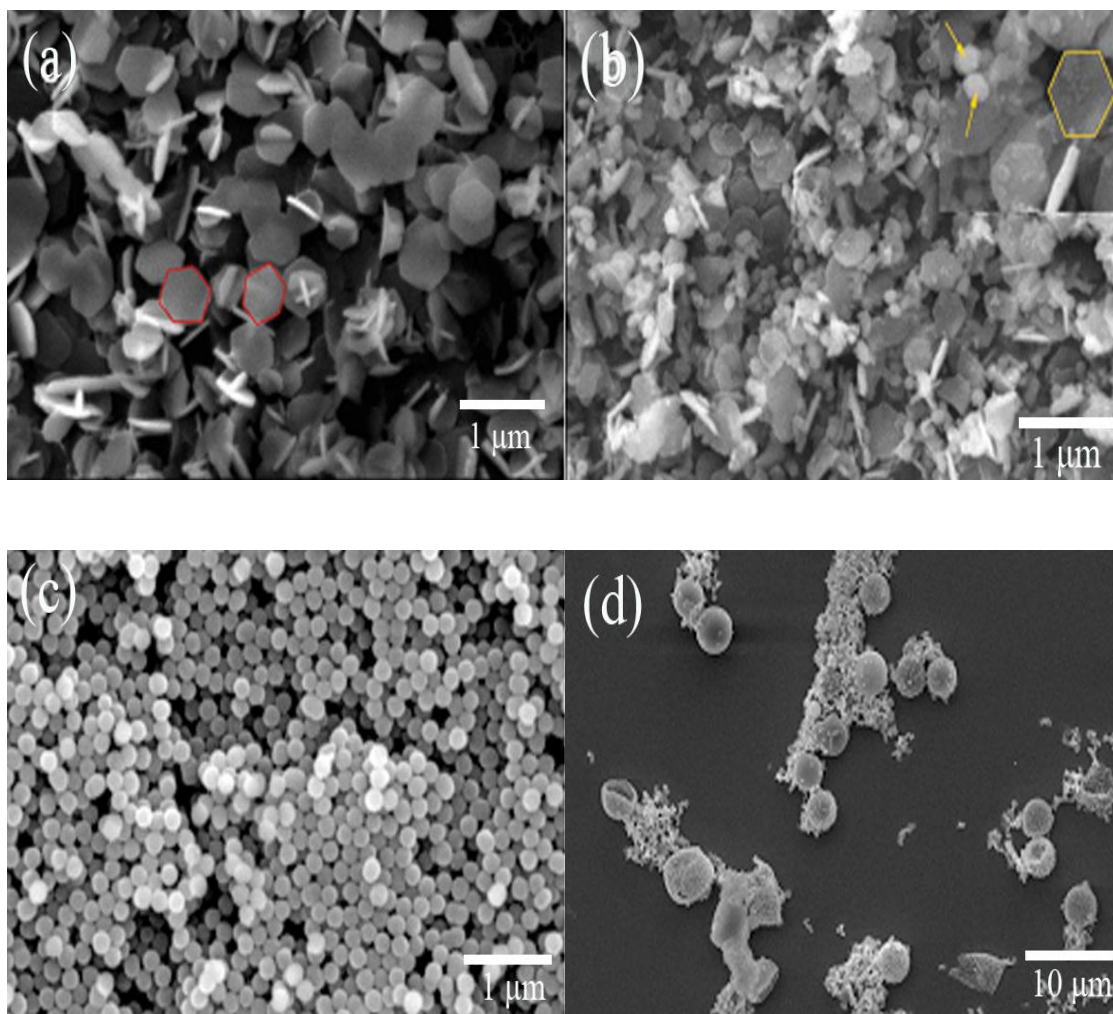

**Fig. S2** The influence of PLL peptide concentration on silica morphology. (a) 1 mg/ml, (b) 3 mg/ml, (c) 6 mg/ml, and (d) 9 mg/ml.

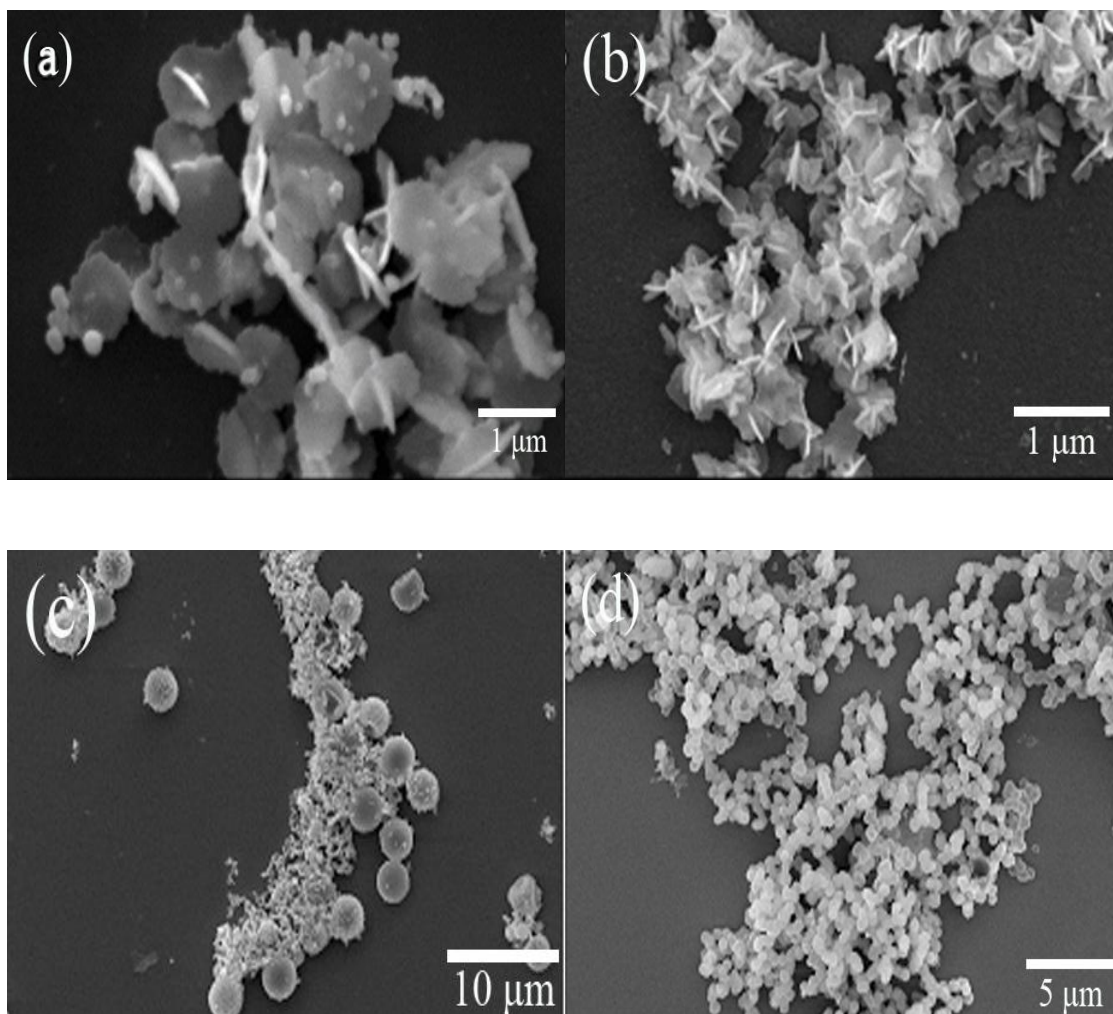

**Fig. S3** The morphologies of silica were affected by the value of pH: (a) 6.5, (b) 7.0, (c) 7.6, and (d) 9.0.

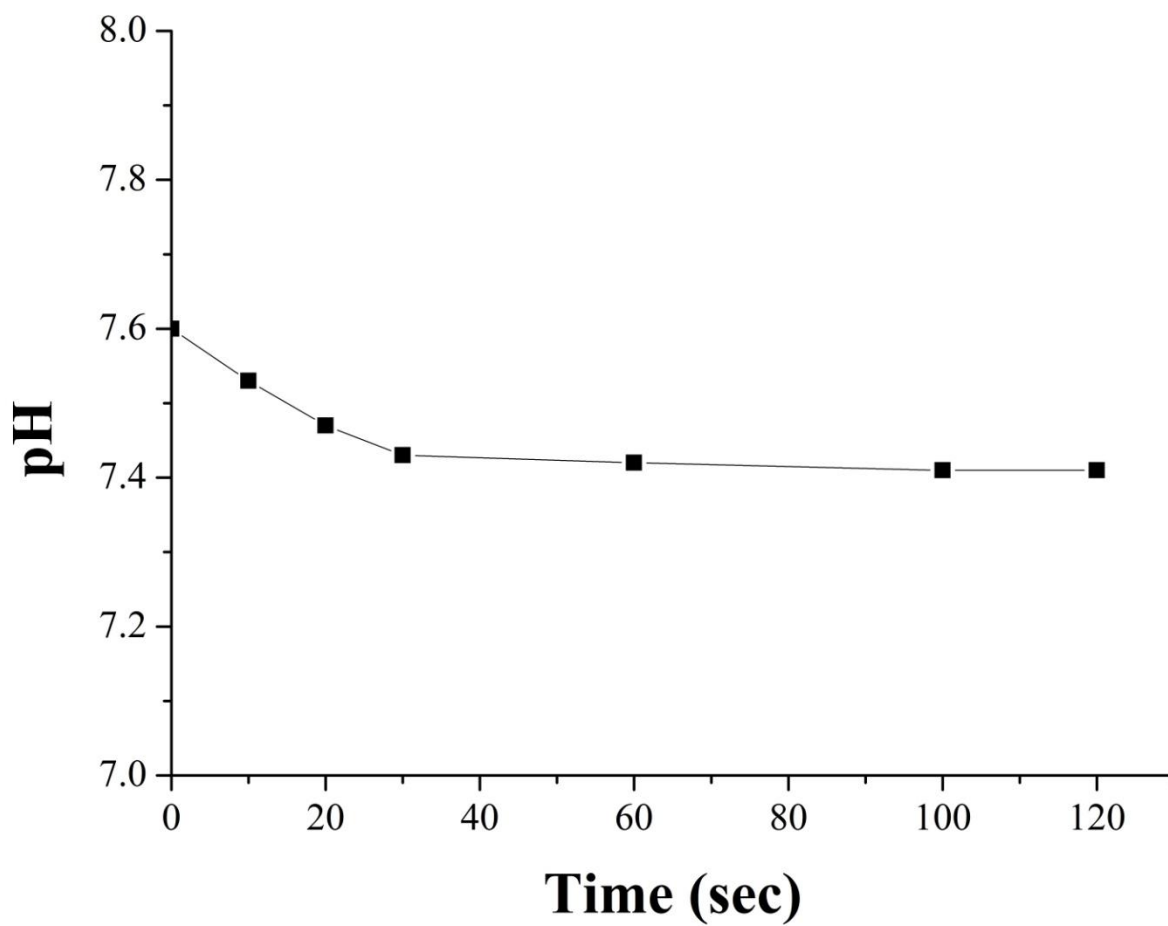

**Fig. S4** The pH variation of the biomimetic reaction upon silicic acid was added to the peptide/PBS mixture.

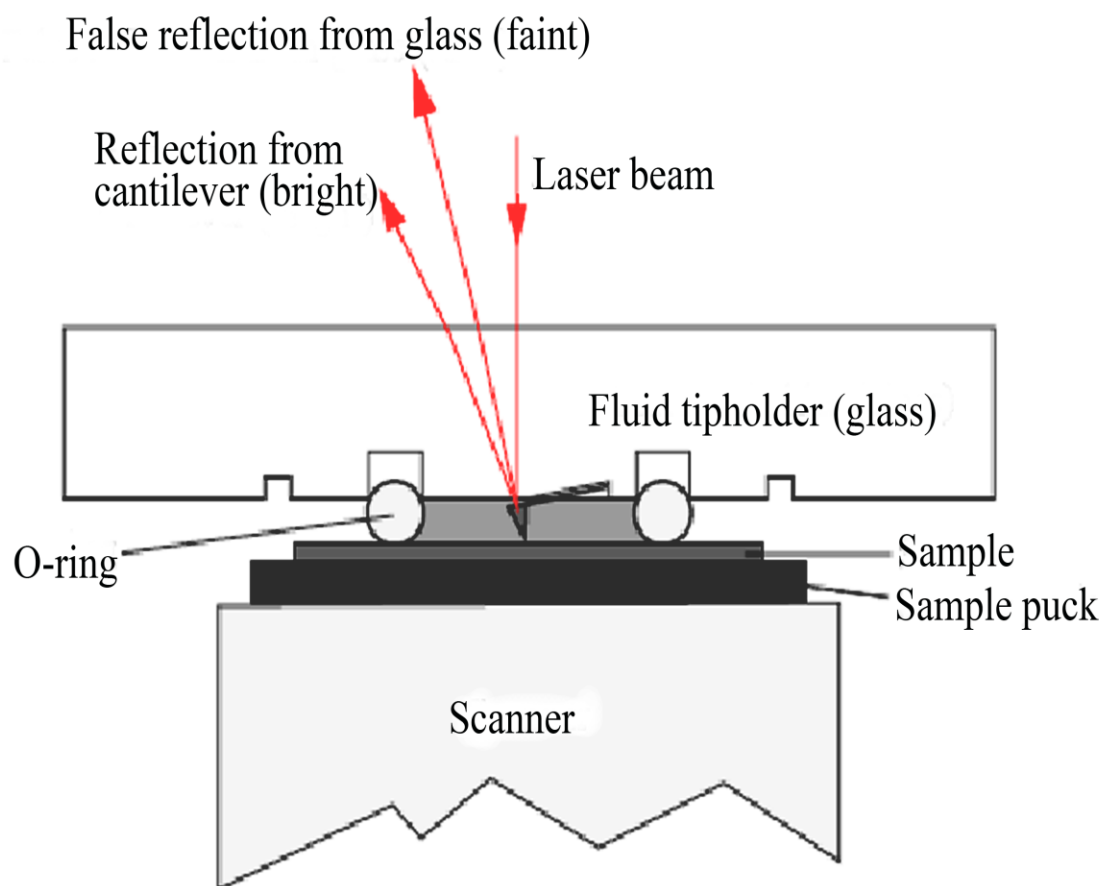

**Fig. S5** The structure schematic diagram of Liquid Cell Tip Holder.

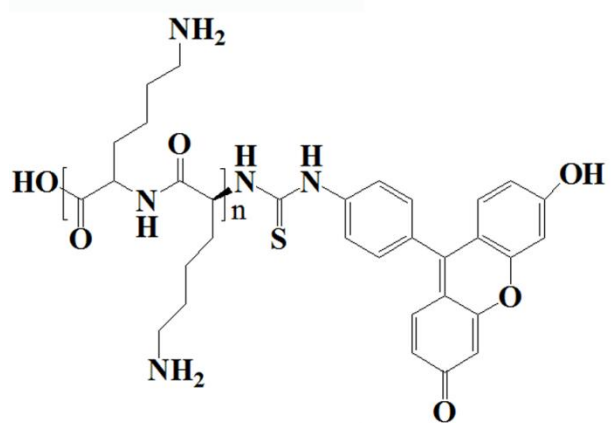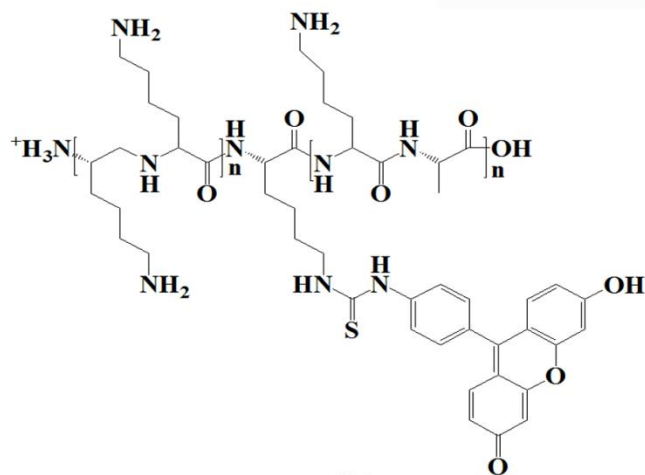

Fig. S6 Chemical structure of (a) FITC-terminal-tagged PLL and (b) FITC-middle-tagged PLL.

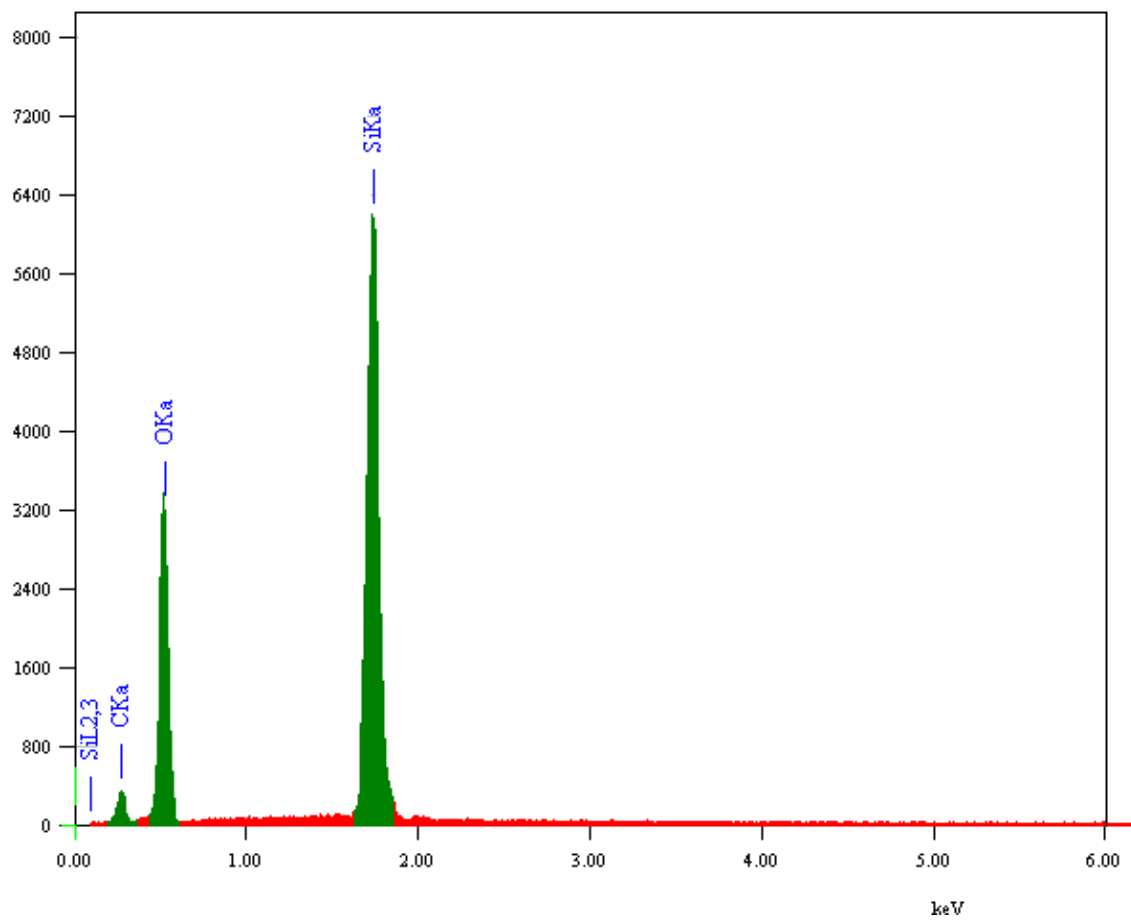

**Fig. S7** Representative EDS spectrum of silica mediated by PLL.

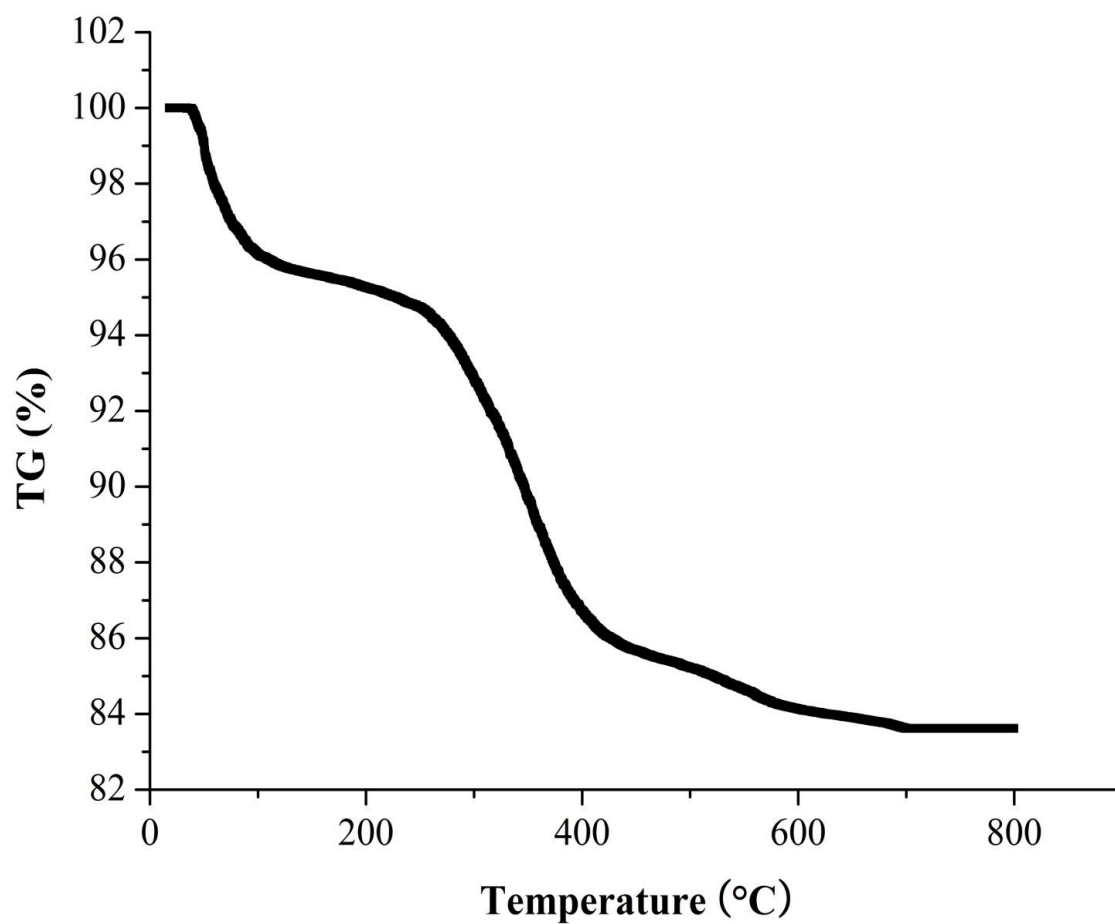

**Fig. S8** Representative TGA spectrum of silica precipitated using PLL.
